# Supplementary material for: Synthesis of cationic acrylate copolyvidone-iodine nanoparticles with double active centers and their antibacterial application
Source: Royal Society of Chemistry journal article supplement (doi:10.1039/d0nr05462c), 2020-01-01
Supplement: d0nr05462c1.pdf [file d0nr05462c1.pdf]

## Supporting Information

### Synthesis of Cationic Acrylate Copolyvidone- Iodine Nanoparticles with Double Active Centers and Their Antibacterial Application

Xuemei Li, Bin Wang, Tingyu Liang, Rongmin Wang\*, Pengfei Song, Yufeng He\*

Key Laboratory of Eco-functional Polymer Materials of the Ministry of Education, Institute  
of Polymer, College of Chemistry & Chemical Engineering, Northwest Normal University,

Lanzhou 730070, China. \*Corresponding author, Fax/ Tel: +86-931-7970358.

[heyufeng@nwnu.edu.cn](mailto:heyufeng@nwnu.edu.cn) (YF He); [wangrm@nwnu.edu.cn](mailto:wangrm@nwnu.edu.cn) (RM Wang)

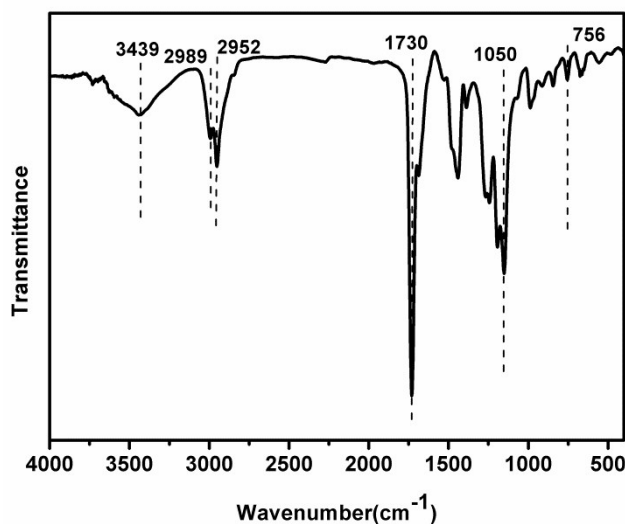

**Fig. S1.** FT-IR spectra of CACPVI.

In Fig. S2, CACPVI solution turns yellow initially due to the presence of iodine.

When 2 mol L<sup>-1</sup> sulfuric acid solution and 1mL starch solution were added, the yellow

solution turned blue, which was mainly because the starch appears blue when encountering iodine. After adding a certain concentration of sodium thiosulfate solution, the blue solution turned white. These color changes correspond to the redox reaction (see eq 1), indicating the presence of iodine.

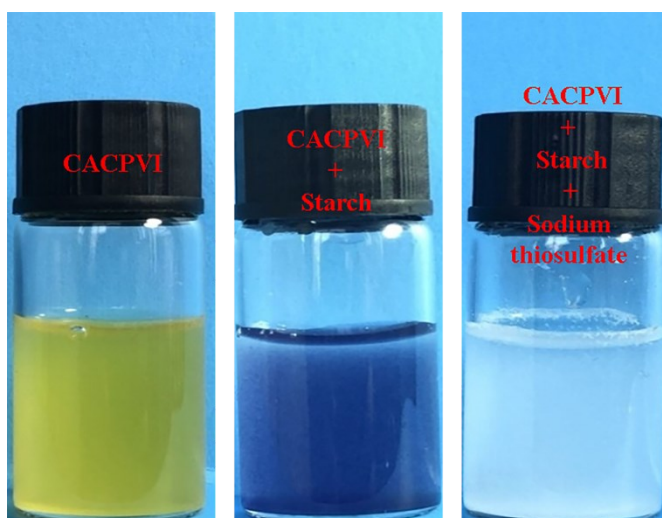

**Fig. S2.** Photographs of CACPVI suspension during iodometric titration.

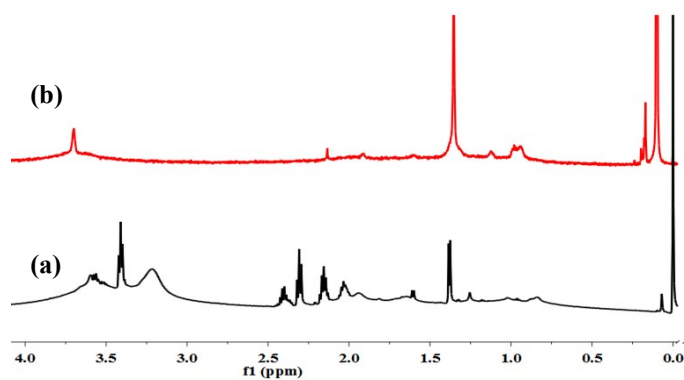

**Fig. S3.** <sup>1</sup>H NMR spectra of (a) CACPVI and (b) CACPVI.

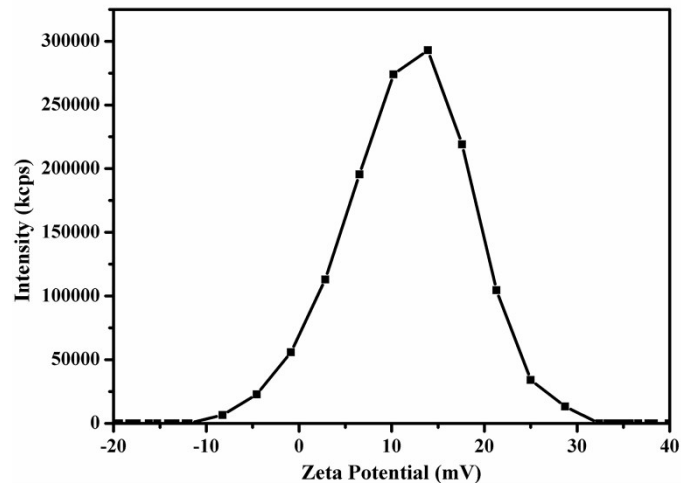

**Fig. S4.** Zeta potential of CACPVI.

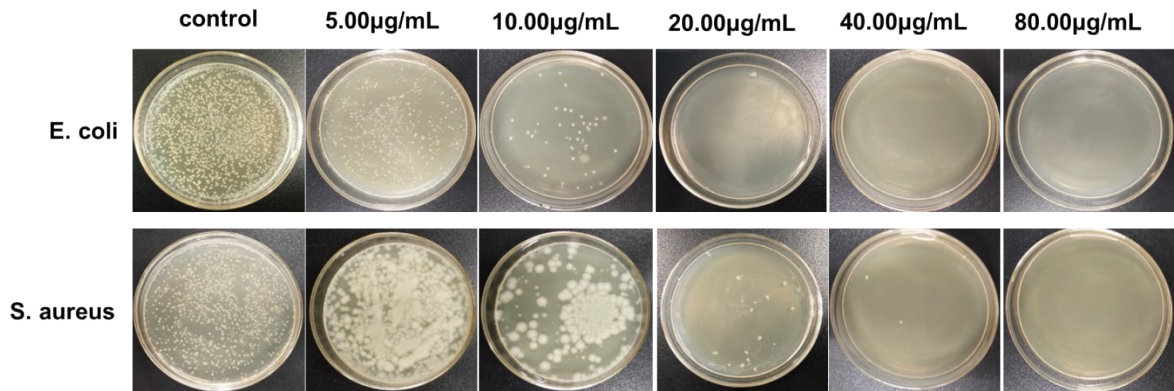

**Fig. S5.** Photographs of culture plates of *E. coli* and *S. aureus* after exposure to CACPVI at different concentrations.
